# Supplementary material
Source: PubMed Central journal article supplement (PMC2769182)
Supplement: JCI39088sd.pdf [file JCI39088sd.pdf]

## Supplemental Figures

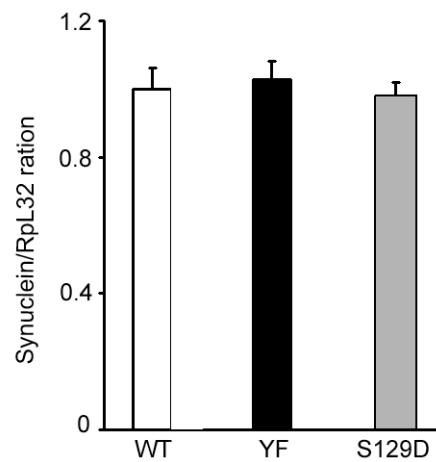

### **Su**pplemental Figure 1. Quantitative real-time PCR comparison of $\alpha$ -synuclein

**expression levels in transgenic flies.**  $\alpha$ -synuclein expression levels in fly heads in relation to ribosomal protein RpL32. Results show similar  $\alpha$ -synuclein expression levels in all three genotypes. Experiments were performed in triplicate and were repeated three times with no consistent differences in  $\alpha$ -synuclein expression observed over independent experiments.

Driver is *elav-GAL4*.

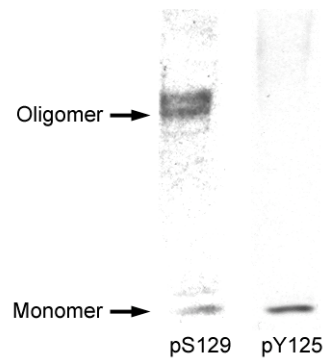

**Supplemental Figure 2. Oligomerized  $\alpha$ -synuclein is preferentially phosphorylated at Ser-129, and less phosphorylated at Tyr-125.** Membranes with protein preparations from flies expressing wild-type  $\alpha$ -synuclein were first probed with anti-PS129, followed by membrane stripping and reprobing with PY125. Exposure times were adjusted to obtain comparable hybridization signals from monomer  $\alpha$ -synuclein. Driver is *elav-GAL4*. Flies are 20 days old.

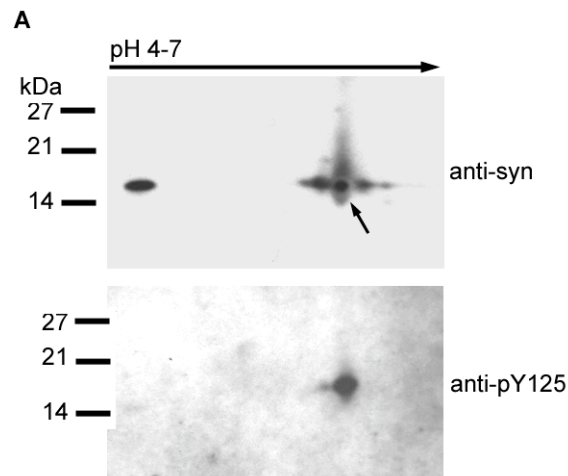

**Supplemental Figure 3. Quantitative analysis of the extent of  $\alpha$ -synuclein**

**phosphorylation at Tyr-125.** Soluble protein fractions were prepared from flies expressing wild-type  $\alpha$ -synuclein immediately after decapitation and subjected to two-dimensional gel electrophoresis. The same membrane was probed with anti- $\alpha$ -synuclein, followed by stripping and reprobing with the PY125 antibody. Arrow indicates the Tyr-125 phosphorylated  $\alpha$ -synuclein. Extent of phosphorylation was calculated as intensity of signal for phosphorylated  $\alpha$ -synuclein as a fraction of total  $\alpha$ -synuclein.  $31.1 \pm 1.4\%$  (mean  $\pm$  S.E.M. of three independent experiments) of wild type  $\alpha$ -synuclein is phosphorylated at Tyr-125. Driver is *elav-GAL4*. Flies are 10 days old.

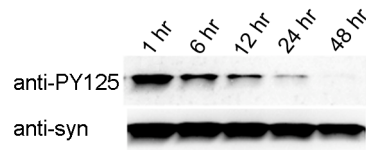

**Supplemental Figure 4. Dephosphorylation of  $\alpha$ -synuclein post mortem.** To examine the stability of phosphorylation of Tyr-125 post mortem, heads from flies expressing wild-type  $\alpha$ -synuclein were incubated at room temperature after decapitation for 1 hour to 48 hours prior to extraction, and soluble fractions were subjected to immunoblot analysis with PY125 (upper panel) and anti- $\alpha$ -synuclein (lower panel). Driver is *elav-GAL4*. Flies are 20 days old.

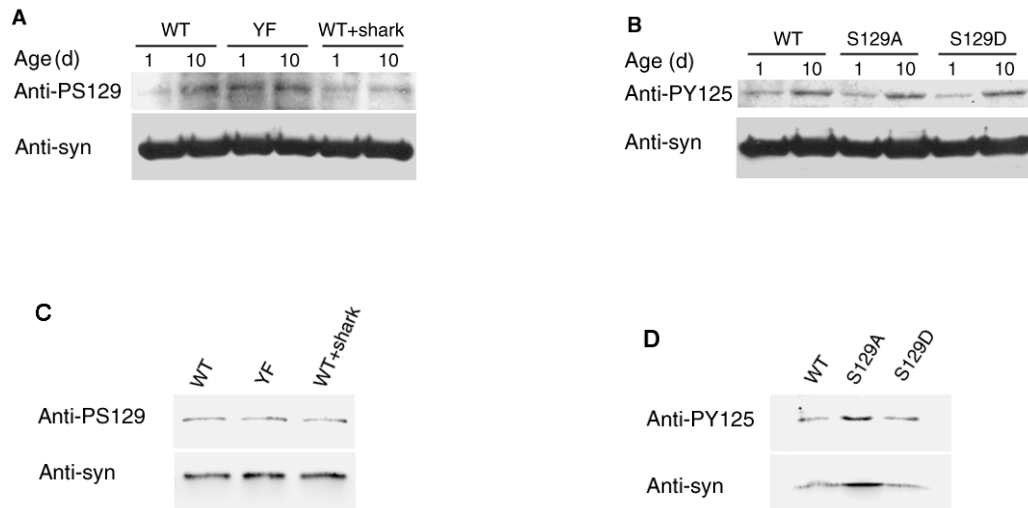

**Supplemental Figure 5.** Phosphorylation at Tyr-125 does not directly affect the phosphorylation at Ser-129 or visa versa. Western blot analysis of soluble (**A-B**) and insoluble (**C-D**) fractions of head extracts from transgenic flies expressing wild-type or mutant  $\alpha$ -synuclein driven by *elav-GAL4*. Age refers to days after eclosion in A and B. Flies are 20 days old in C and D.

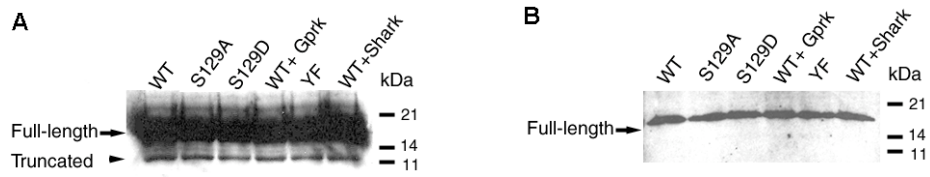

**Supplemental Figure 6. Amount of naturally truncated  $\alpha$ -synuclein is not altered by the phosphorylation status at Ser-129 or Tyr-125. (A) SDS-PAGE analysis of 20-day-old flies expressing wild-type or mutant  $\alpha$ -synuclein as labeled above each lane under the control of the *elav-GAL4* driver. Comparable accumulation of a minor truncated form of  $\alpha$ -synuclein migrating at 12 KDa (arrowhead), in addition to the major full-length band migrating at 17 KDa (arrow), is observed. (B) Immunoblot analysis reveals no clear difference in  $\alpha$ -synuclein levels in control and experimental genotypes when using the LB509 antibody, which is directed against the C-terminal region of  $\alpha$ -synuclein.**
